# Supplementary material for: SIRT1-dependent mechanisms and effects of resveratrol for amelioration of muscle wasting in NASH mice
Source: PubMed Central journal article supplement — BMJ Open Gastroenterol. 2020 May 5;7(1):e000381. doi: 10.1136/bmjgast-2020-000381 (PMC7228468; doi:10.1136/bmjgast-2020-000381), 2020-05-05
Supplement: bmjgast-2020-000381supp001.pdf [file bmjgast-2020-000381supp001.pdf]

## Supplement Figures and Legends

## Supplement Figure 1:

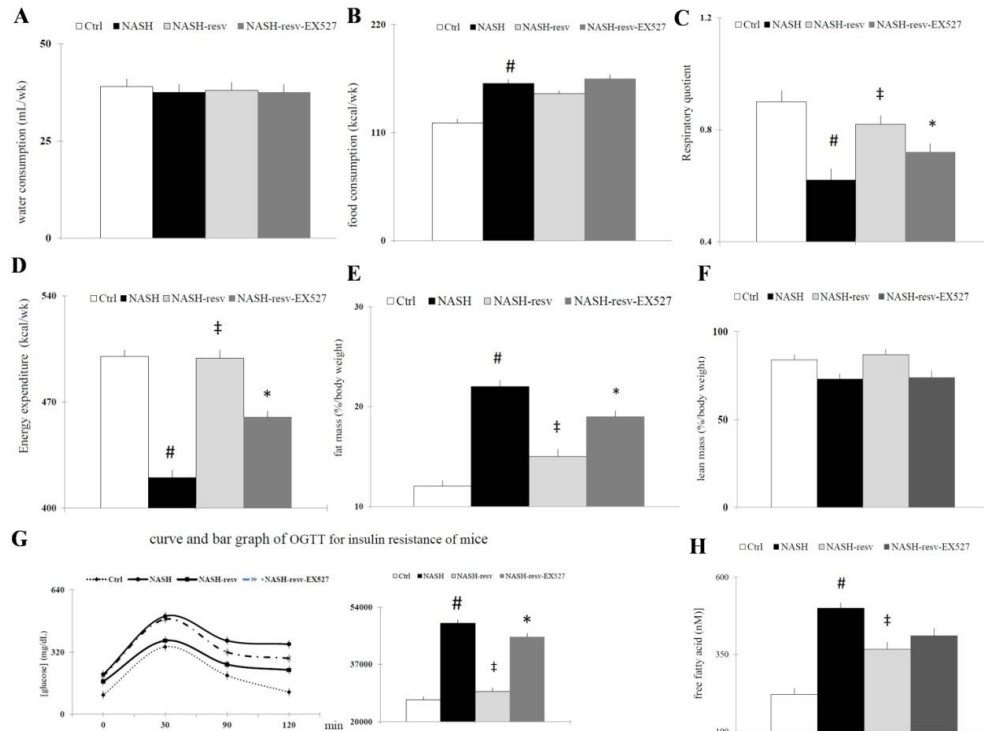

**Supplement Figure 1 | The anti-obesity effects of resveratrol is associated with metabolic benefits in NASH mice.** water (A, mL/wk) and food (B, kcal/wk) consumption, respiratory quotient (C)/energy expenditure(kcal/wk) (D), (E) Fat mass (%/body weight) ,(F) lean mass (%/body weight) and (G) concentration-response curve and bar graph of area under curve (AUC) of oral glucose tolerance test (OGTT) for insulin resistance; (H) serum levels of free fatty acid; <sup>‡</sup> $p < 0.05$  vs. Ctrl group; <sup>#</sup> $p < 0.05$  vs. NASH group; <sup>\*</sup> $p < 0.05$  vs. NASH+resv-group.

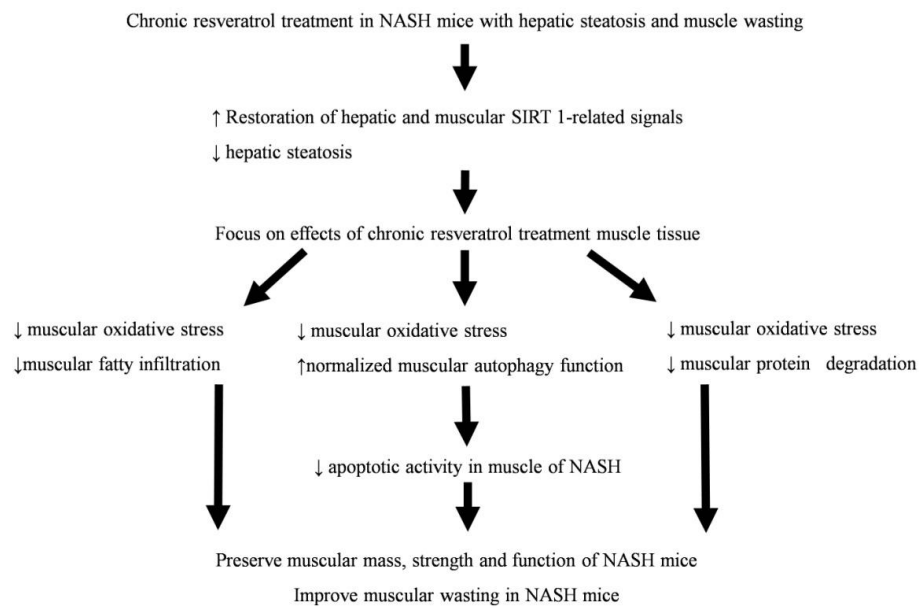

**Supplement Figure 2 | Schematic representative hypothesis for the mechanisms of the prevention of muscle wasting in NASH mice by chronic resveratrol treatment.**
