# Supplementary figures and images for: SIRT1-dependent mechanisms and effects of resveratrol for amelioration of muscle wasting in NASH mice
Source: PubMed Central journal article supplement — BMJ Open Gastroenterol. 2020 May 5;7(1):e000381. doi: 10.1136/bmjgast-2020-000381 (PMC7228468; doi:10.1136/bmjgast-2020-000381), 2020-05-05

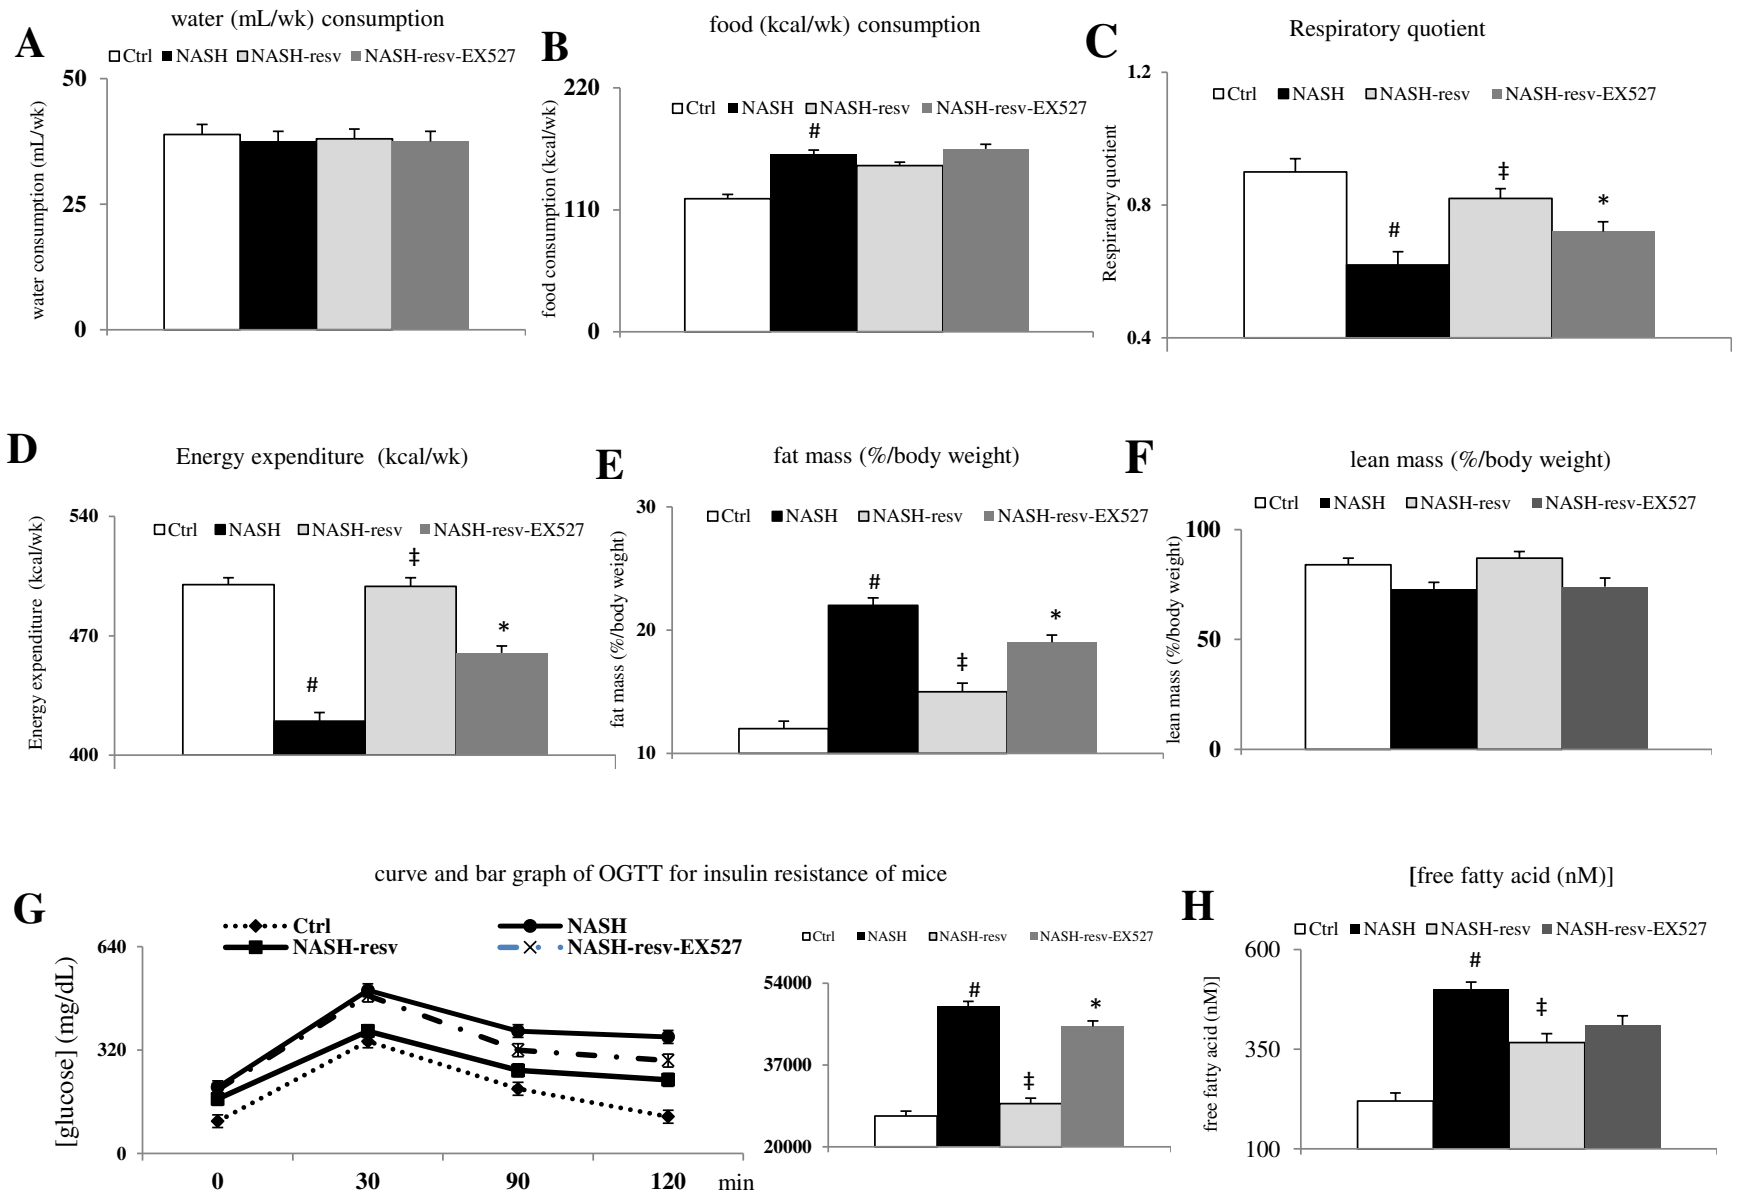

## Supplement Figure 2

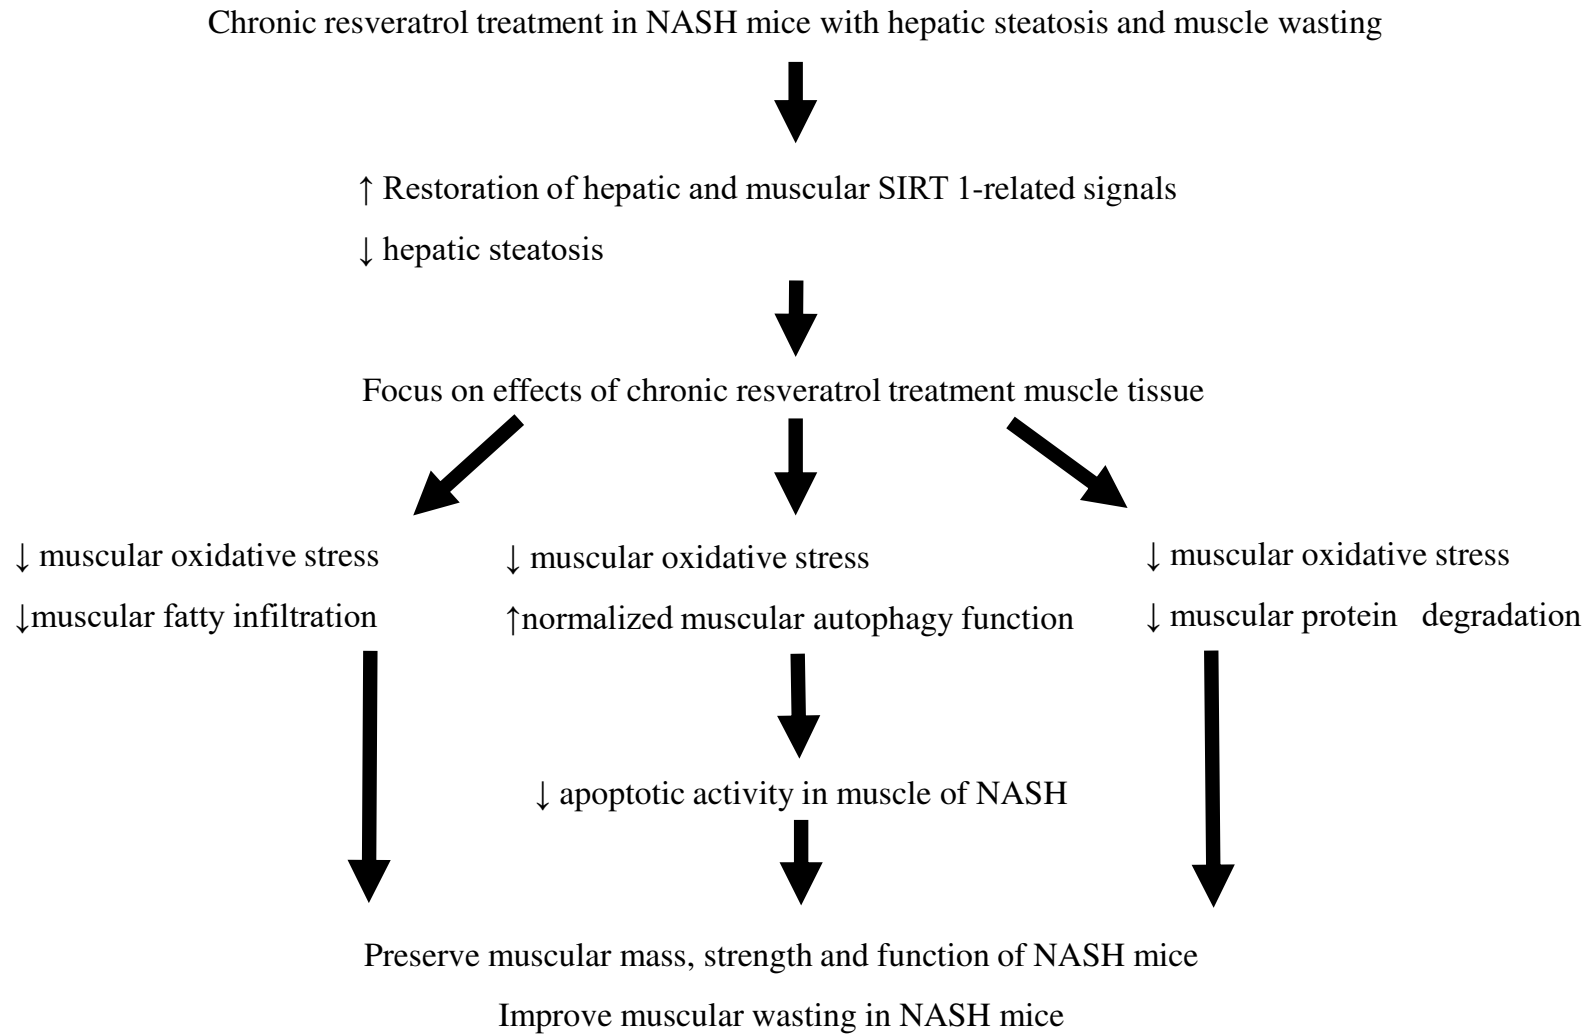

Supplement: bmjgast-2020-000381supp002.pdf [file bmjgast-2020-000381supp002.pdf]
